# Supplementary material for: Genome-Wide Association Study of Salt Tolerance at the Seed Germination Stage in Flax (Linum usitatissimum L.)
Source: MDPI journal article supplement (doi:10.3390/genes13030486), 2022-03-10
Supplement: s1 [file s1]

## Supplementary Figures

### Genome-Wide Association Study of Salt Tolerance at the Seed Germination Stage in Flax (*Linum usitatissimum* L.)

Xiao Li, Dongliang Guo, Min Xue, Gongze Li, Qingcheng Yan, Haixia Jiang, Huiqing Liu, Jiaxun Chen, Yanfang Gao, Lepeng Duan and Liqiong Xie\*

<sup>1</sup> Xinjiang Key Laboratory of Biological Resources and Genetic Engineering,  
College of Life Science and Technology, Xinjiang University, Urumqi 830046,  
Xinjiang, China; gaoxke@126.com

\* Correspondence: picea@xju.edu.cn

**Supplementary Figure S1.** Linkage disequilibrium (LD) decay distance.

**Supplementary Figure S2.** Comparison of GR, SL, RL under control (CK) and treatment.

**Supplementary Figure S3.** Distribution of salt tolerance indexes in subpopulations.

**Supplementary Figure S4.** Genome-wide association study (GWAS) for RGR.

**Supplementary Figure S5.** Genome-wide association study (GWAS) for RSL.

**Supplementary Figure S6.** Genome-wide association study (GWAS) for RRL.

**Supplementary Figure S7.** Boxplots for haplotypes at the lead SNP in QTLs and allele frequency differences among Oil, OF and Fiber subpopulations.

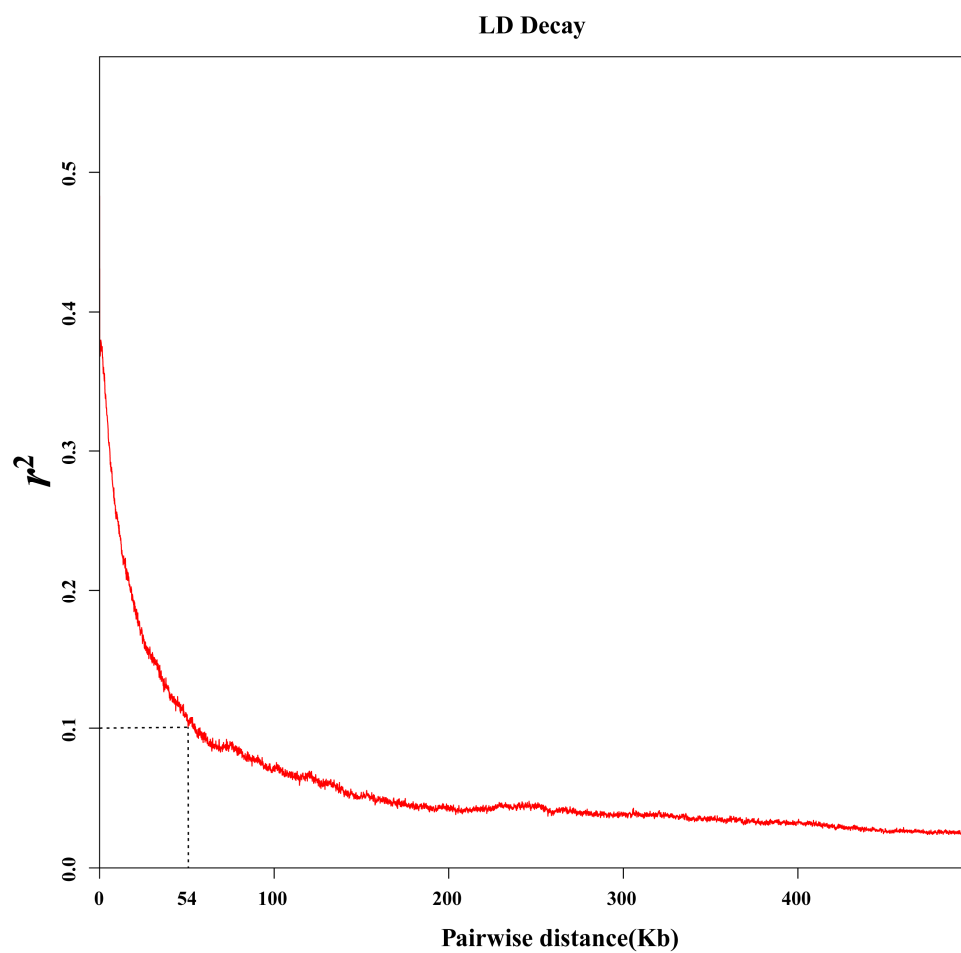

**Supplementary Figure S1.** Linkage disequilibrium (LD) decay distance.

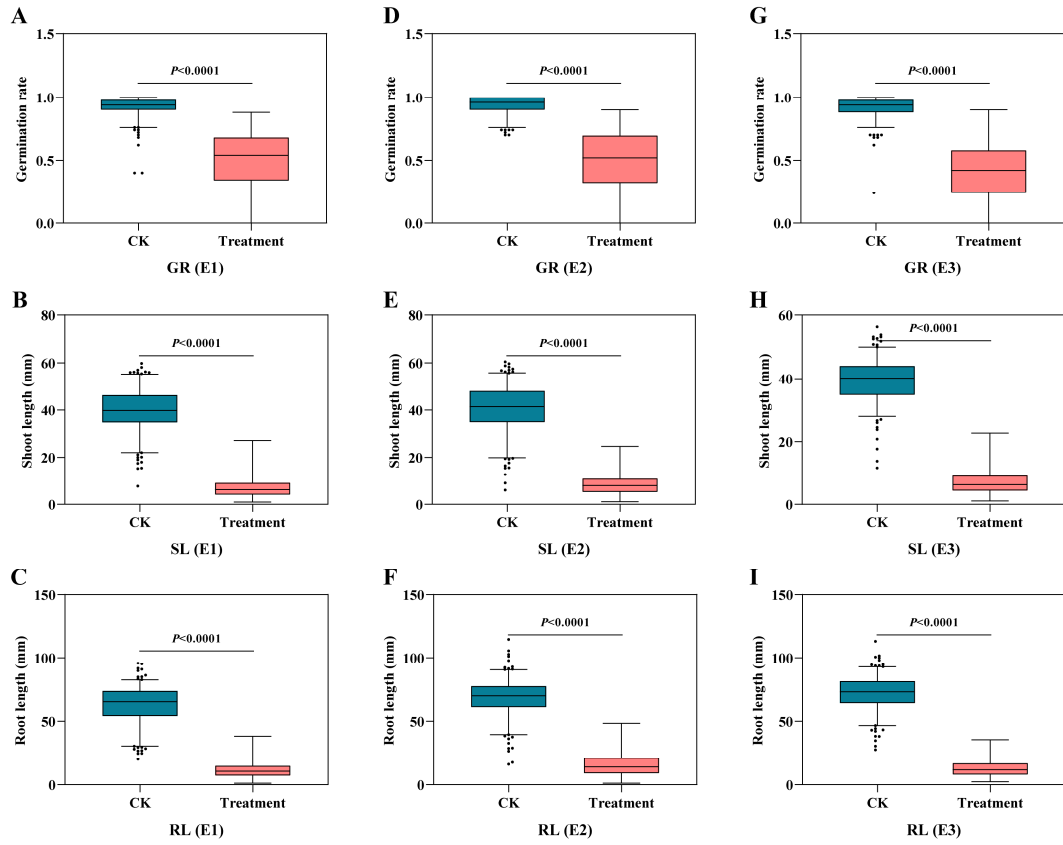

**Supplementary Figure S2.** Comparison of GR, SL, RL under control (CK) and treatment. (A–C) In environment 1 (E1); (D–F) In environment 2 (E2); (G–I) In environment 3 (E3). The difference between subpopulations was analyzed by  $t$  tests.

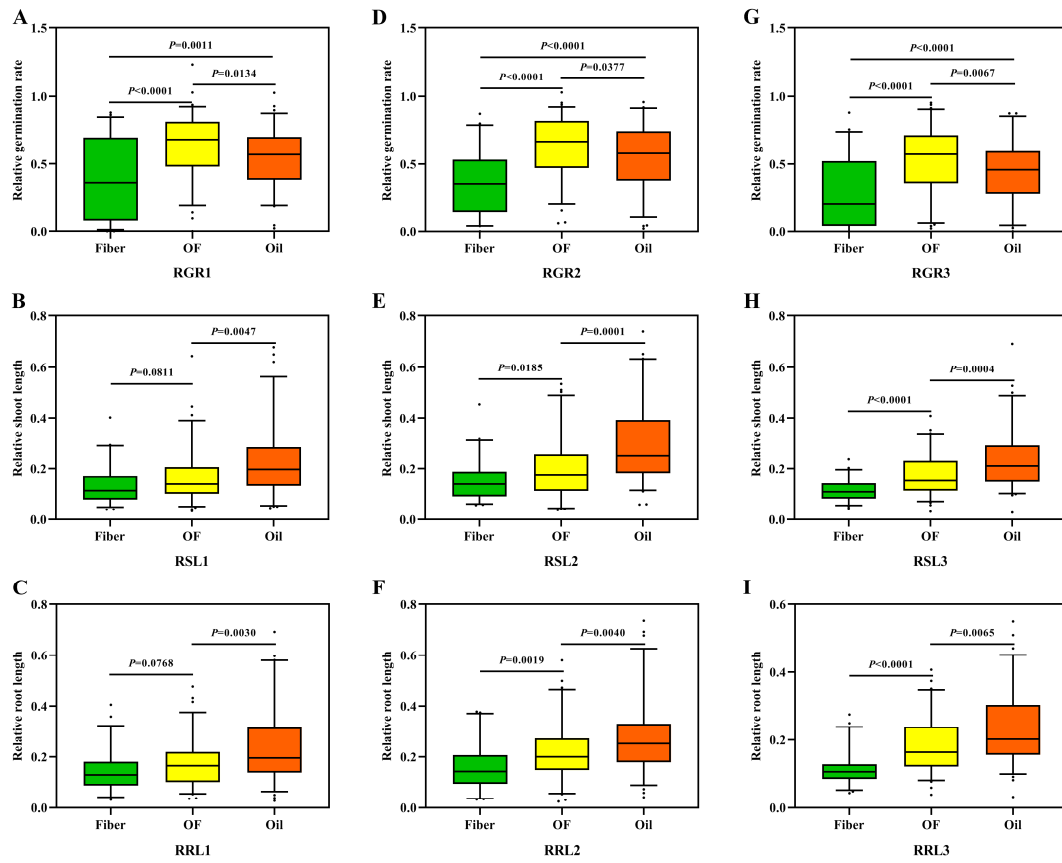

**Supplementary Figure S3.** Distribution of salt tolerance indexes in subpopulations. (A–C) In environment 1 (E1); (D–F) In environment 2 (E2); (G–I) In environment 3 (E3). The difference between subpopulations was analyzed by *t* tests.

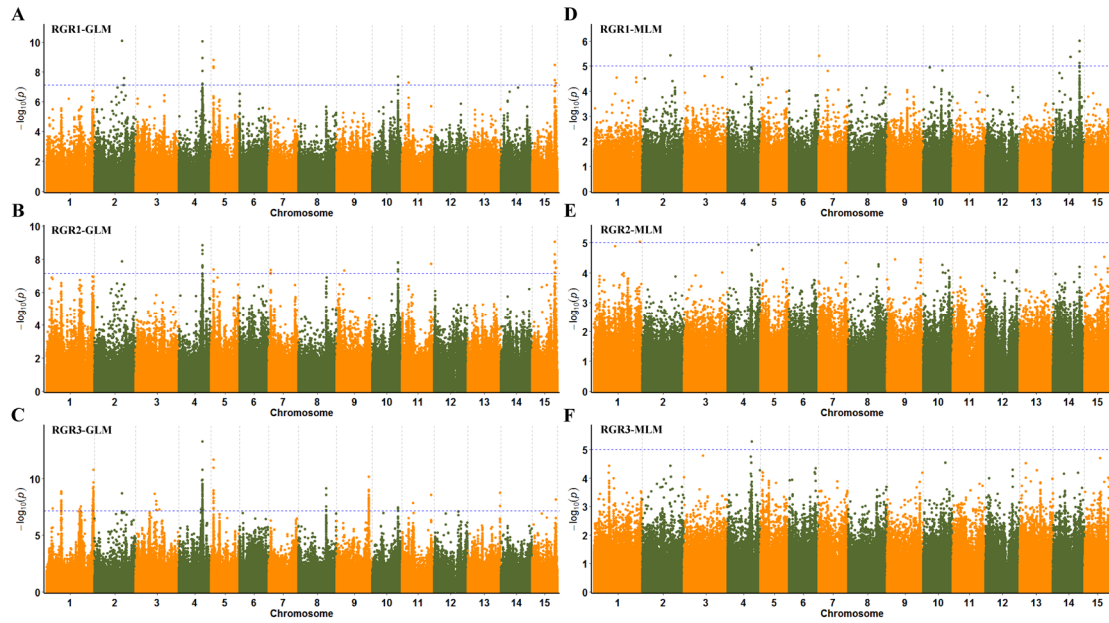

**Supplementary Figure S4.** Genome-wide association study (GWAS) for RGR. (A–C) Manhattan plots based on GLM; (D–F) Manhattan plots based on MLM; (A, D) RGR1; (B, E) RGR2; (C, F) RGR3. The blue dotted line indicates the threshold, and the points above the threshold are significant SNPs.

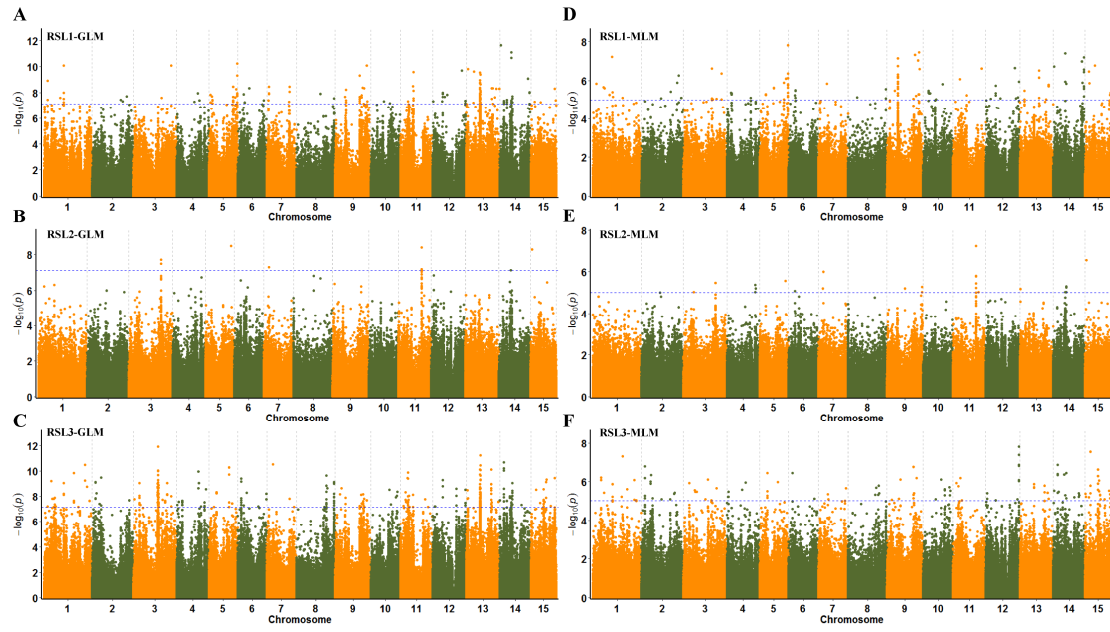

**Supplementary Figure S5.** Genome-wide association study (GWAS) for RSL. (A–C) Manhattan plots based on GLM; (D–F) Manhattan plots based on MLM; (A, D) RSL1. (B, E) RSL2; (C, F) RSL3. The blue dotted line indicates the threshold, and the points above the threshold are significant SNPs.

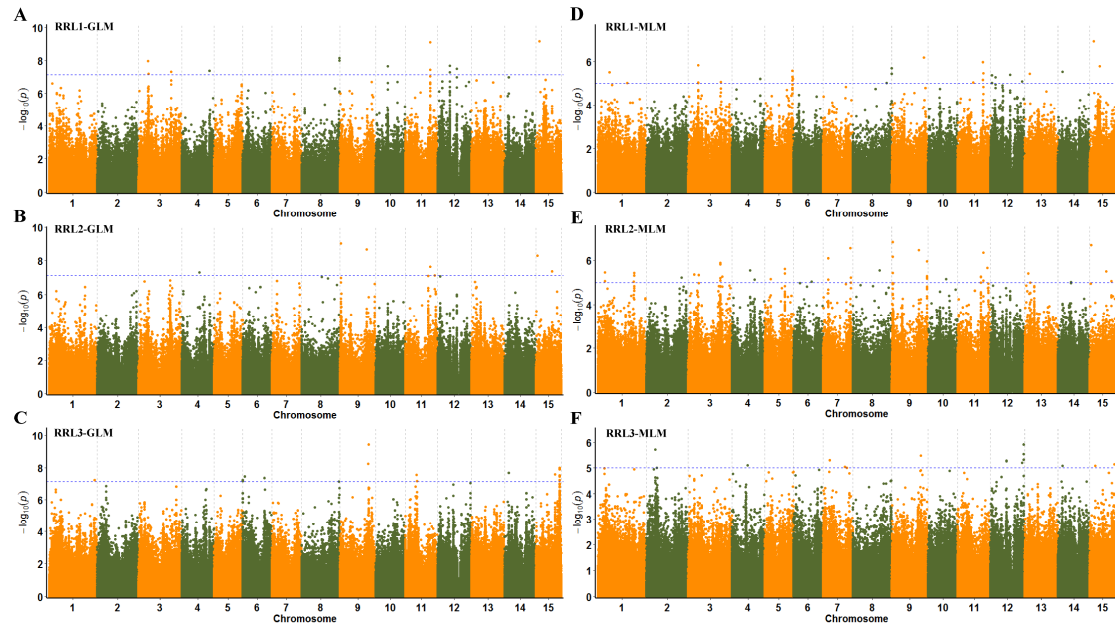

**Supplementary Figure S6.** Genome-wide association study (GWAS) for RRL. (A–C) Manhattan plots based on GLM; (D–F) Manhattan plots based on MLM; (A, D) RRL1. (B, E) RRL2; (C, F) RRL3. The blue dotted line indicates the threshold, and the points above the threshold are significant SNPs.

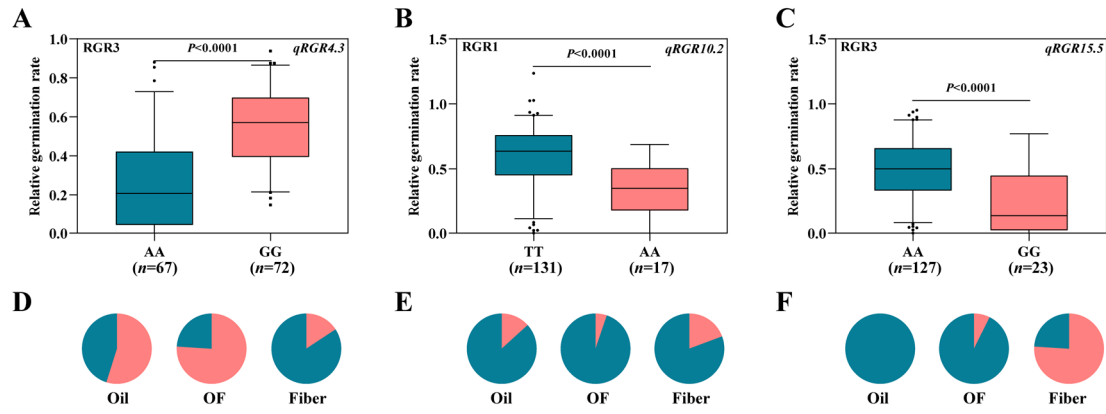

**Supplementary Figure S7.** Boxplots for haplotypes at the lead SNP in QTLs and allele frequency differences among Oil, OF and Fiber subpopulations. (A–C) Boxplots for haplotypes at the lead SNP in QTLs; (A) *qRGR4.3*; (B) *qRGR10.2*; (C) *qRGR15.5*; (D–F) The distribution of allele frequencies of strong SNPs are located in QTLs were distributed in Oil, OF and Fiber subpopulations; (D) *qRGR4.3*. The AA and GG alleles are shown in blue and pink, respectively; (E) *qRGR10.2*. The TT and AA alleles are shown in blue and pink, respectively; (F) *qRGR15.5*. The AA and GG alleles are shown in blue and pink, respectively. The difference between haplotypes was analyzed by *t* tests.
